# Supplementary material for: Teen Mental Health First Aid for years 7–9: a description of the program and an initial evaluation
Source: Int J Ment Health Syst. 2019 Nov 16;13:71. doi: 10.1186/s13033-019-0325-4 (PMC6858708; doi:10.1186/s13033-019-0325-4)
Supplement: Supplementary file 1 — Additional file 1. Sociodemographic characteristics of the schools. [file 13033_2019_325_MOESM1_ESM.pdf]

## Additional file 1: Sociodemographic characteristics of the schools

| Characteristic                             | School 1       | School 2     | School 3     | School 4     | School 5     |
|--------------------------------------------|----------------|--------------|--------------|--------------|--------------|
| <b>Location</b>                            | Regional       | Metropolitan | Metropolitan | Metropolitan | Metropolitan |
| <b>School sector</b>                       | Non-government | Government   | Government   | Government   | Government   |
| <b>Year range</b>                          | 7-12           | 7-12         | 7-12         | 7-12         | 7-12         |
| <b>ICSEA*</b>                              | 1062           | 1141         | 940          | 986          | 965          |
| <b>Total enrolments</b>                    | 805            | 453          | 551          | 887          | 281          |
| <b>Percent girls</b>                       | 52             | 49           | 47           | 47           | 48           |
| <b>Percent language other than English</b> | 5              | 30           | 5            | 7            | 2            |
| <b>Percent Indigenous</b>                  | 1              | 1            | 5            | 1            | 2            |

\* ICSEA = Index of Socio-Educational Advantage, with M=1000 and SD=100
